# Supplementary material for: Effect of Primary Care Parent-Targeted Interventions on Parent-Adolescent Communication About Sexual Behavior and Alcohol Use: A Randomized Clinical Trial
Source: PubMed Central journal article supplement (PMC6704744; doi:10.1001/jamanetworkopen.2019.9535), 2019-08-16
Supplement: jamanetwopen-2-e199535-s002.pdf [file jamanetwopen-2-e199535-s002.pdf]

## **Data Sharing Statement**

Ford. Effect of Primary Care Parent-Targeted Interventions on Parent-Adolescent Communication About Sexual Behavior and Alcohol Use.

*JAMA Netw Open*. Published August 16, 2019.

10.1001/jamanetworkopen.2019.9535

### **Data**

**Data available:** No
